# Supplementary material for: Biparatopic antibody BA7208/7125 effectively neutralizes SARS-CoV-2 variants including Omicron BA.1-BA.5
Source: Springer Nature journal article supplement (doi:10.1038/s41421-022-00509-9), 2023-01-07
Supplement: MOESM1 [file 41421_2022_509_MOESM1_ESM.pdf]

## **Methods**

### **Binding free energy calculation**

To calibrate the binding affinities of the S protein with antibodies and predict the binding ability of the BA7054-7125-RBD complexes which lacked the experimental data, we used the Flex ddG protocol<sup>1</sup> implemented within Rosetta to calculate the changes in binding free energies (interface  $\Delta\Delta G$ ) upon mutation. All Spikes were truncated to include only the RBD domain in the S protein RBD-antibody complexes. The data from the Delta Spike RBD (monomer)-antibody were set as the references, with which the values of all other variants were compared. The  $\Delta\Delta G$  calculation of each system was repeated 50 times and the average values with two different scoring types were reported.

### **Cryo-EM specimen preparation and data acquisition for the Omicron S-BA7208 complex**

90  $\mu\text{L}$  purified Omicron S protein at the concentration of 1.37 mg/mL was incubated with 10.1  $\mu\text{L}$  BA7208 Fab at the concentration of 3.99 mg/mL at a 1:3 molar ratio on ice for 40 min for the next step of size exclusion chromatography (SEC). After centrifugation (16200 g, 4°C for 5 min), 100  $\mu\text{L}$  supernatant was injected to GE micro Akta using Superose 6 column. The peak fraction was applied for cryo-EM grid preparation.

An aliquot of 4  $\mu\text{L}$  protein sample of Omicron S-BA7208 complex was applied onto a glow-discharged 300 mesh grid (Quantifoil Au R1.2/1.3) supported with a thin layer of GO (Graphene Oxide), blotted with filter paper for 3.0 s and plunge-frozen in liquid ethane using a Thermo Fisher Vitrobot Mark IV. Cryo-EM micrographs were collected on a 300kV Thermo Fisher Titan Krios G3i electron microscope equipped with a K3 direct detection camera and a BioQuantum image filter (GIF: a slit width of 20eV). The micrographs were collected at a calibrated magnification of x81,000, yielding a pixel size of 0.856 Å at a super-resolution mode. In total, 2,554 micrographs were collected at an accumulated electron dose of  $50\text{e}^{-}\text{\AA}^{-2}\text{ s}^{-1}$  on each

micrograph that was fractionated into a stack of 32 frames with a defocus range of - 1.0  $\mu\text{m}$  to -2.0  $\mu\text{m}$ .

## **EM data processing**

Beam-induced motion correction was performed on the stack of frames using MotionCorr<sup>2</sup>. The contrast transfer function (CTF) parameters were determined by CTFFIND<sup>3</sup>. A total 2,554 good micrographs were selected for further data processing using Relion 3.1 program<sup>4</sup>. Particles were auto-picked by the Auto-picking program in Relion, followed by two rounds of reference-free 2D classifications. Next, 633,788 particles were selected from good 2D classes and were subjected to two rounds of 3D classification using a reconstruction of the Omicron S-BA7208 complex as a starting model. Two converged 3D classes with a feature contains one Omicron S-BA7208, one Omicron S were selected for a final round of 3D refinement. In the two 3D classes, 495,537 particles from a 3D class showing the highest resolution feature with an additional density were selected for a round of 3D refinement, yielding a final reconstruction at a global resolution of 2.62 Å based on the gold-standard Fourier shell correlation criterion at FSC=0.143. The local resolution was then calculated on the final density map.

## **Model building and refinement**

The model of Omicron S-BA7208 complex was built by fitting the model of structure of Omicron S-BA7208 (predicted by AlphaFold2) into the density map using UCSF Chimera<sup>5,6</sup>, followed by a manual model building of Omicron S-BA7208 complex molecules in COOT<sup>7</sup> and a real space refinement in PHENIX<sup>8</sup>. The model statistics were listed in Supplementary information, Table S7.

## **References**

1 Barlow, K. A. *et al.* Flex ddG: Rosetta Ensemble-Based Estimation of

84 Changes in Protein-Protein Binding Affinity upon Mutation. **122**, 5389-5399,  
85 doi:10.1021/acs.jpcb.7b11367 (2018).

86 2 Zheng, S. Q. *et al.* MotionCor2: anisotropic correction of beam-induced  
87 motion for improved cryo-electron microscopy. *Nat Methods* **14**, 331-332,  
88 doi:10.1038/nmeth.4193 (2017).

89 3 Rohou, A. & Grigorieff, N. CTFFIND4: Fast and accurate defocus estimation  
90 from electron micrographs. *J Struct Biol* **192**, 216-221,  
91 doi:10.1016/j.jsb.2015.08.008 (2015).

92 4 Zivanov, J. *et al.* New tools for automated high-resolution cryo-EM structure  
93 determination in RELION-3. *Elife* **7**, doi:10.7554/eLife.42166 (2018).

94 5 Pettersen, E. F. *et al.* UCSF Chimera--a visualization system for exploratory  
95 research and analysis. *J Comput Chem* **25**, 1605-1612,  
96 doi:10.1002/jcc.20084 (2004).

97 6 Bryant, P., Pozzati, G. & Elofsson, A. Improved prediction of protein-protein  
98 interactions using AlphaFold2. *Nat Commun* **13**, 1265, doi:10.1038/s41467-  
99 022-28865-w (2022).

100 7 Bond, P. S., Wilson, K. S. & Cowtan, K. D. Predicting protein model  
101 correctness in Coot using machine learning. *Acta Crystallogr D Struct Biol* **76**,  
102 713-723, doi:10.1107/S2059798320009080 (2020).

103 8 Adams, P. D. *et al.* PHENIX: a comprehensive Python-based system for  
104 macromolecular structure solution. *Acta Crystallogr D Biol Crystallogr* **66**,  
105 213-221, doi:10.1107/S0907444909052925 (2010).

106

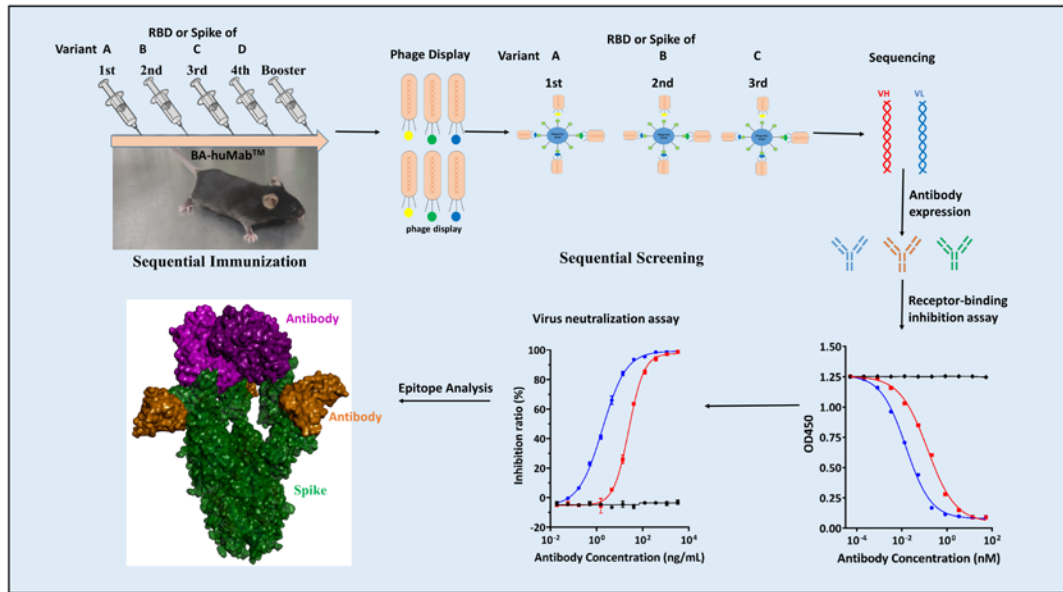

**Fig. S1 Graphical Abstract for antibody identification and characterization** mAbs against SARS-CoV-2 variants were produced through sequential immunization and followed sequential screening from human antibody transgenic mice. ScFvs of potential clones were sequenced and then converted into IgG format for expression. Antibodies showing RBD/ACE2 receptor blocking activity were obtained for *in vitro* neutralization activity evaluation. Structure analysis was performed for the broadly potent neutralizing mAbs.

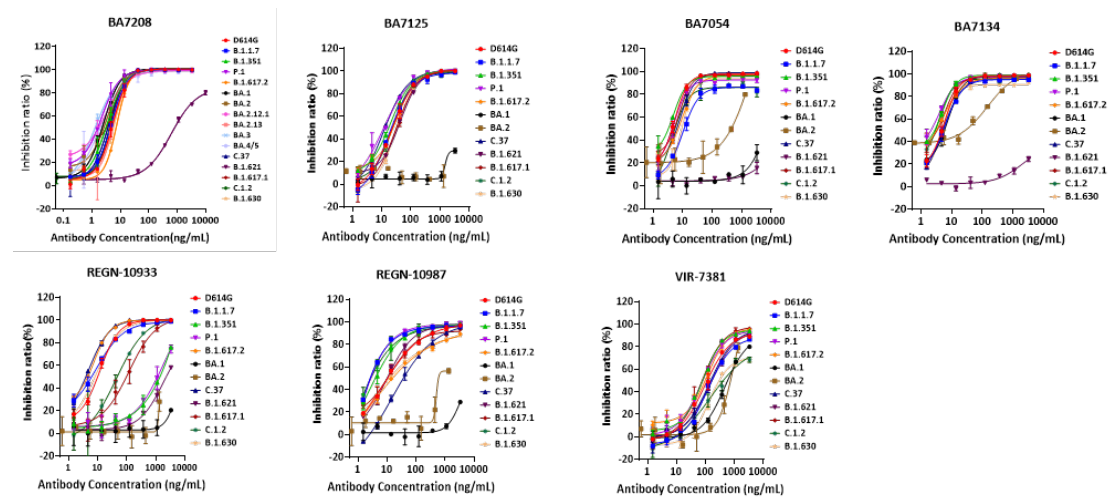

**Fig. S2 Neutralization curves of anti-SARS-CoV-2 antibodies against diverse SARS-CoV-2 variants.** Neutralization curves of the indicated antibodies against the pseudoviruses decorated with the corresponding SARS-CoV S proteins are shown. Data was collected from two biological replicates and represented as Mean $\pm$ SD.

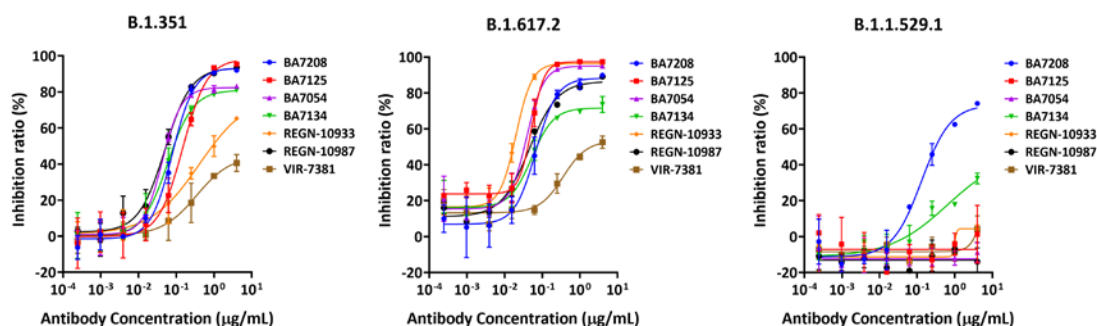

**Fig. S3 Blocking activity of anti-SARS-CoV-2 antibodies for RBD-ACE2 binding**

Blocking activity of four candidate antibodies and three approved antibodies against RBDs of Beta (B.1.351), Delta (B.1.617.2) and BA.1 (B.1.1.529.1) binding to hACE2 was analyzed in ELISA-based receptor-binding inhibition assay. Experiments were performed in triplicate, value = Mean  $\pm$  SD.

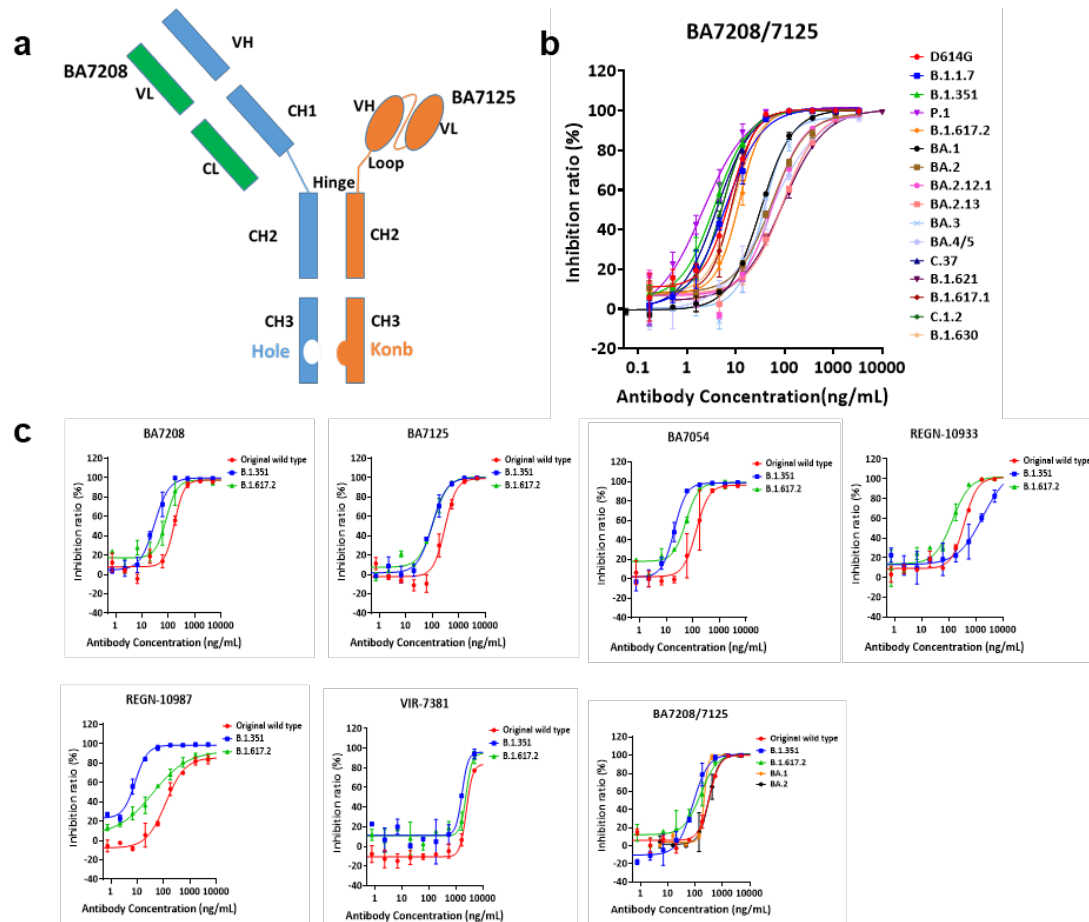

**Fig. S4 Comparison of neutralizing activity and affinity between the bispecific BA7208/7125 and its parental antibodies.** **a** Schematic diagram of the bispecific BA7208/7125. The Knob-into-Hole design was used in the Fc region. **b** Neutralization curves of the indicated antibodies against the pseudoviruses decorated with the corresponding SARS-CoV S proteins are shown. Data was collected from two biological replicates and represented as Mean $\pm$ SD. **c** Neutralization curves against the authentic SARS-CoV-2 variants are shown for each of the indicated antibodies. Two biological replicates were performed.



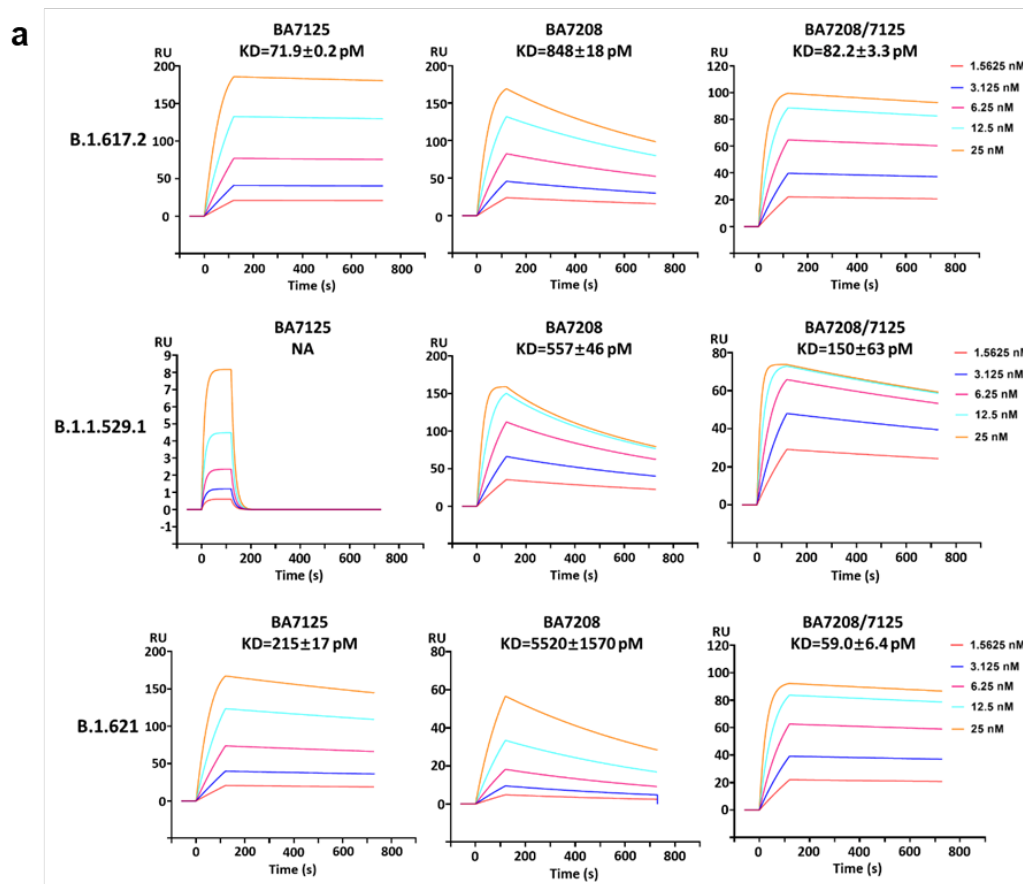

**b**

| Antibody ID | KD(pM) by Biacore  |               |                           |
|-------------|--------------------|---------------|---------------------------|
|             | Delta<br>B.1.617.2 | Mu<br>B.1.621 | Omicron BA.1<br>B.1.1.529 |
| BA7125      | 71.9 ± 0.2         | 215 ± 17      | NA                        |
| BA7208      | 848 ± 18           | 5520 ± 1570   | 557 ± 46                  |
| BA7208/7125 | 82.2 ± 3.3         | 59.0 ± 6.4    | 150 ± 63                  |

**Fig. S5 The binding kinetics of the bispecific BA7208/7125 and its parental antibodies to RBD of B.1.617.2, B.1.1.529.1 and B.1.621 variants.** **a** Antibodies were immobilized onto protein A biosensors and the RBD-His was in solutions. The binding sensorgrams for indicated antibodies were shown with serially diluted RBD proteins in different colors. KD data was collected from two biological replicates and represented as Mean ± SD. **b** KD values of the indicated antibodies to RBD of Omicron BA.1 (B.1.1.529.1), Delta and Mu variants examined by SPR. NA: little to no binding.

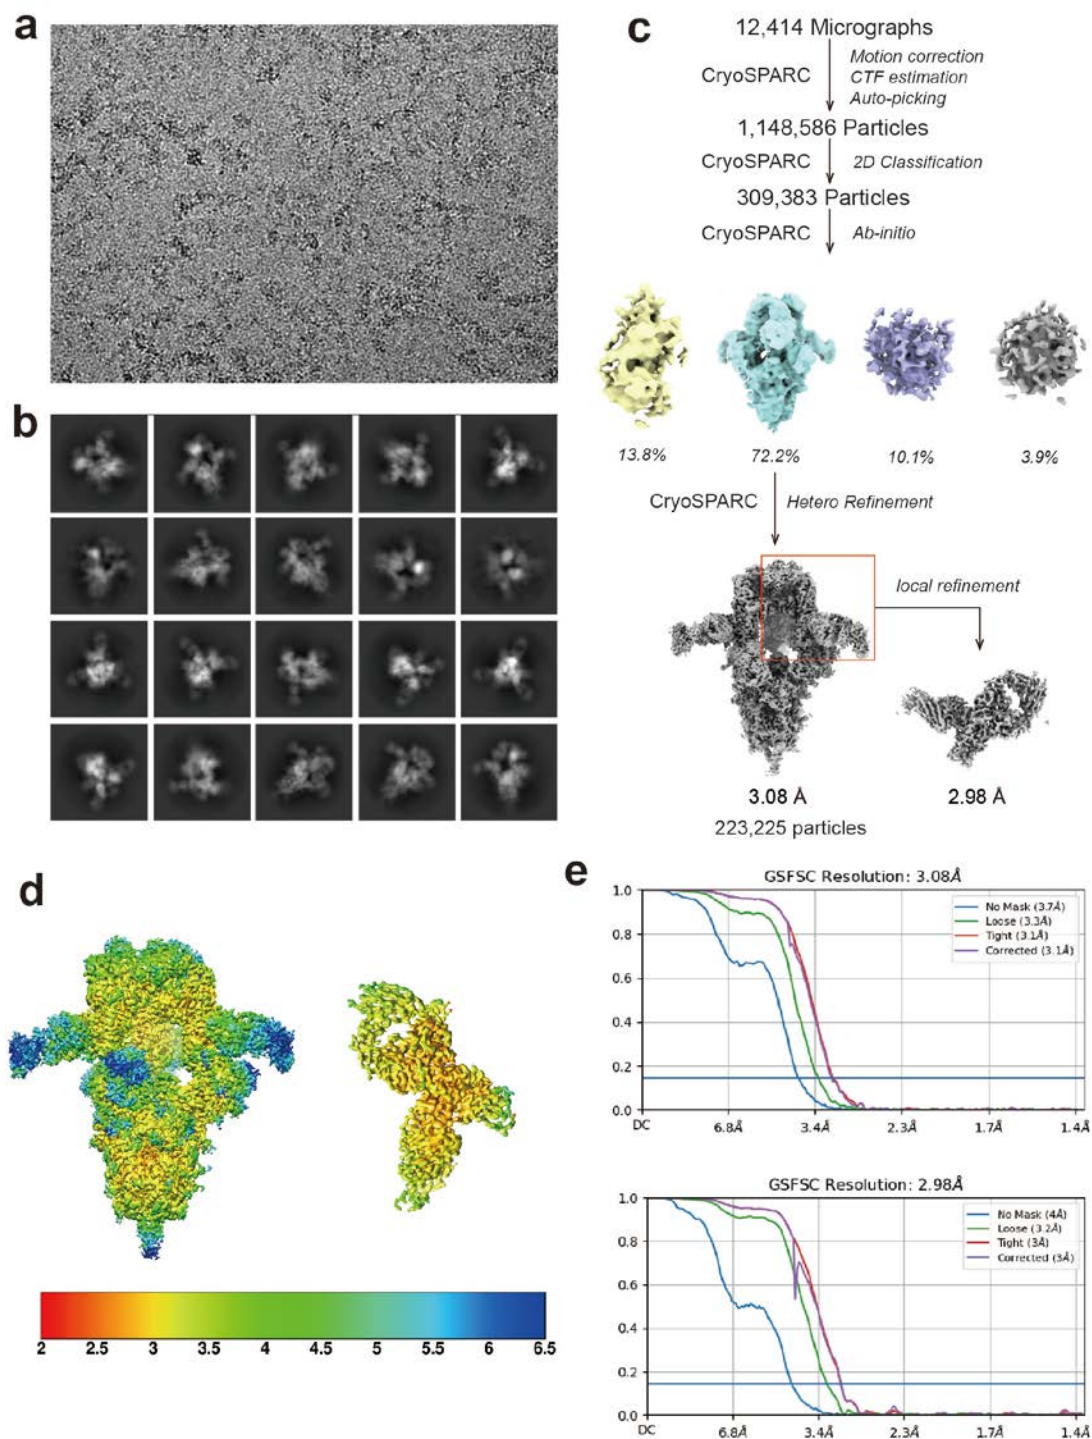

**Fig. S6 Cryo-EM data processing of Delta Spike/BA7208-Fab/BA7125-Fab. a** Representative cryo-EM micrograph of Delta-Spike/BA7208-Fab/BA7125-Fab. **b** 2D class average images of Delta-Spike/BA7208-Fab/BA7125-Fab. **c** Brief workflow of cryo-EM image processing and reconstruction. **d** Cryo-EM map of Delta-Spike/BA7208-Fab/BA7125-Fab, and Delta-RBD/BA7208-Fab/BA7125-Fab colored by local resolution (Å). **e** The FSC curves for the reconstructions.

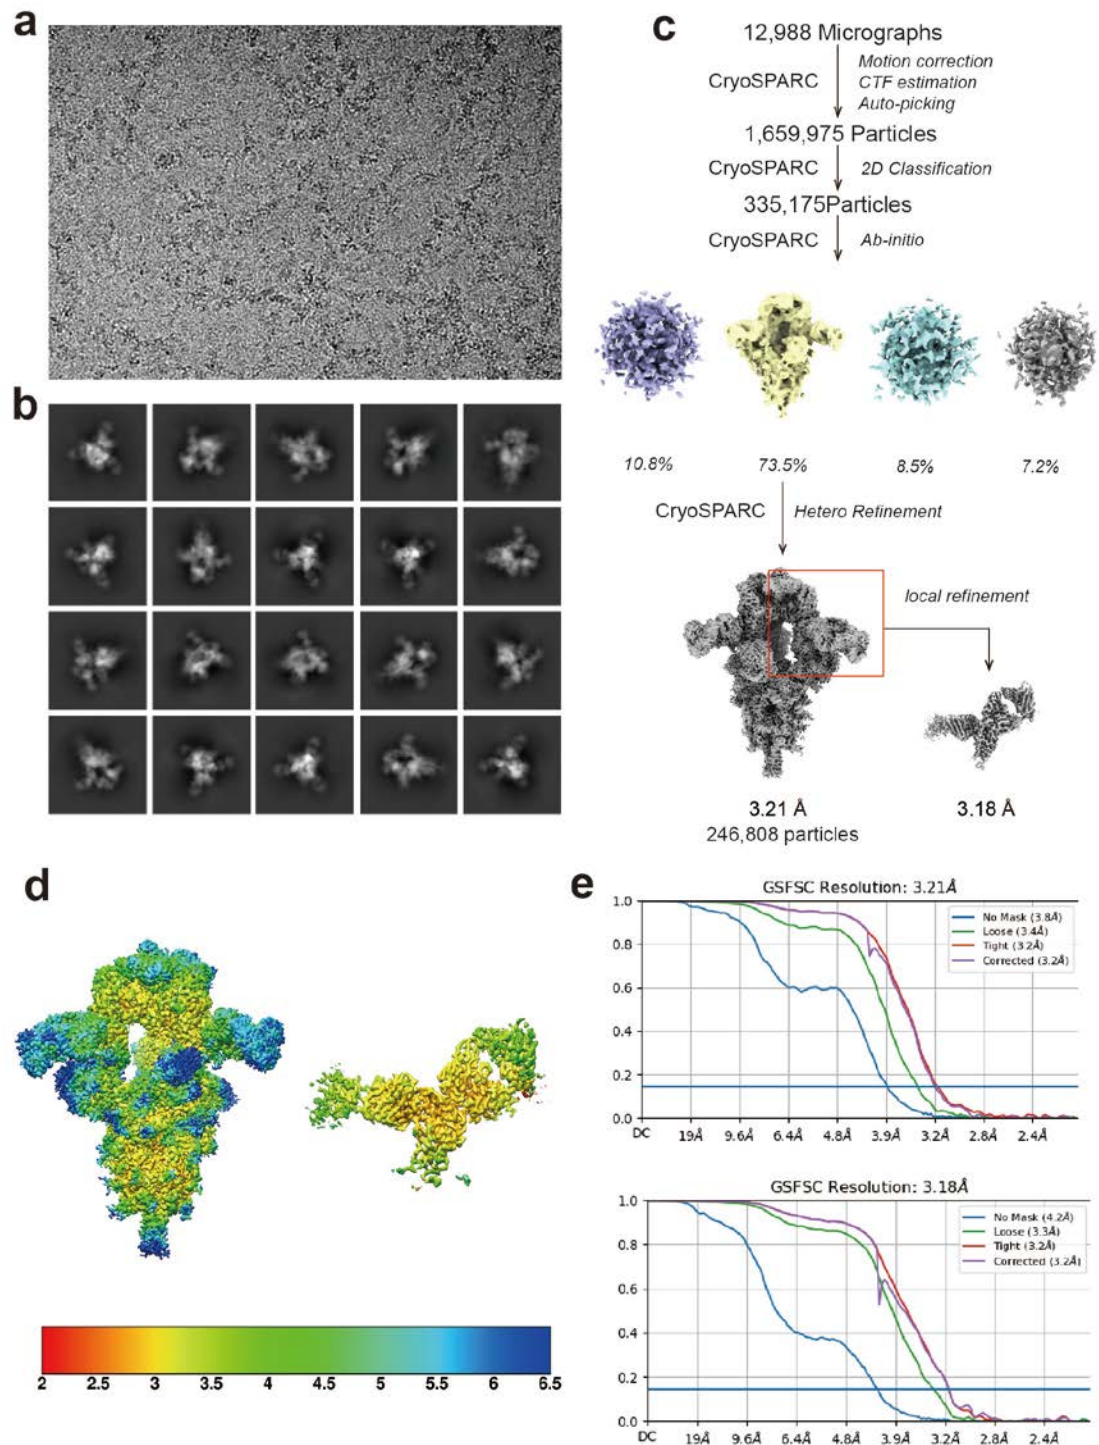

**Fig. S7 Cryo-EM data processing of Delta-Spike/BA7054-Fab/BA7125-Fab.** **a** Representative cryo-EM micrograph of the Delta-Spike/BA7208-Fab/BA7125-Fab. **b** 2D class average images of Delta-Spike/BA7208-Fab/BA7125-Fab. **c** Brief workflow of cryo-EM image processing and reconstruction. **d** Cryo-EM map of Delta-Spike/BA7208-Fab/BA7125-Fab, and Delta-RBD/BA7208-Fab/BA7125-Fab colored by local resolution (Å). **e** The FSC curves for the reconstructions.



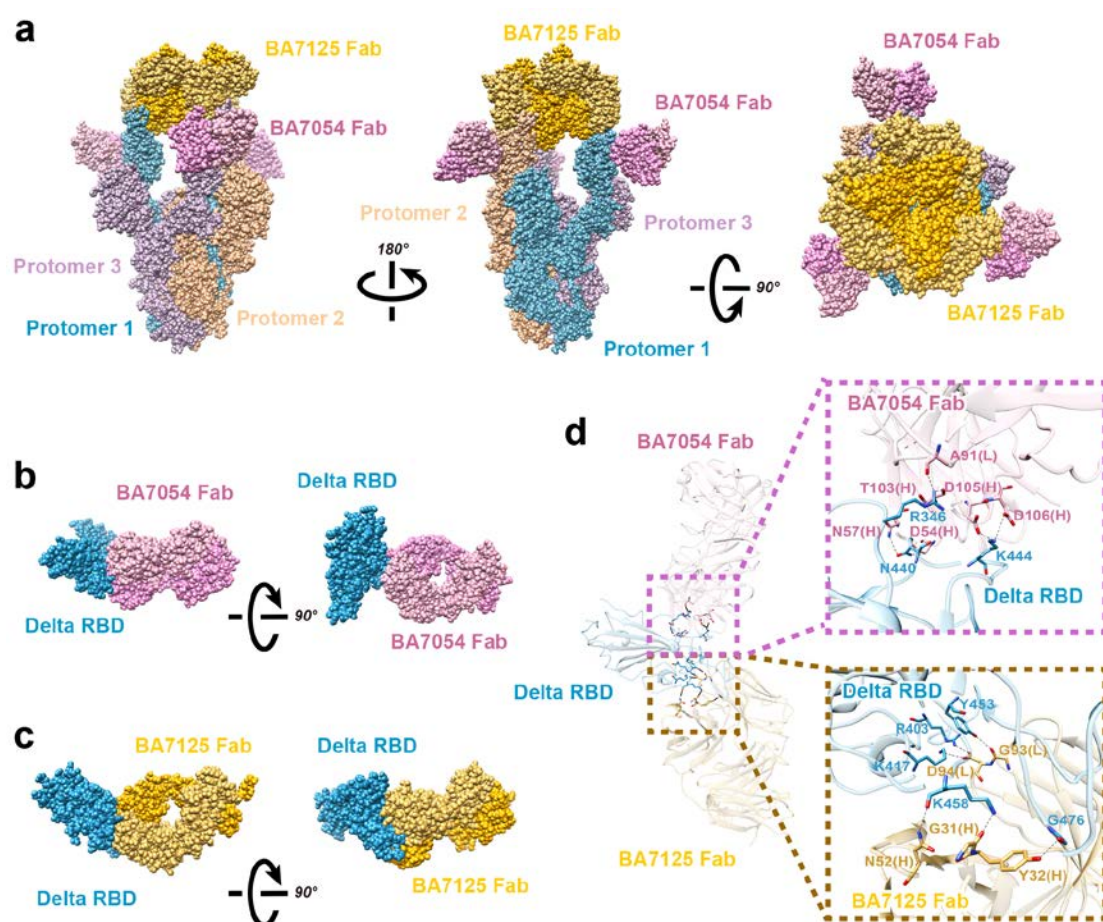

**Fig. S8 Cryo-electron microscopy of Delta Spike Trimer with BA7054-Fab/BA7125-Fab.** **a** The complex of three BA7054-Fabs (pink) and three BA7125-Fab (yellow) with Delta Spike Trimer (dodger blue, plum, and rosy brown). **b** The complex of BA7054-Fab (light pink, Fab light chain; dark pink, Fab heavy chain) with Delta Spike RBD (dodger blue). **c** The complex of BA7125-Fab (light yellow, Fab light chain; dark yellow, Fab heavy chain) with Delta Spike RBD (dodger blue). **d** Zoomed-in views of Fabs binding sites on Delta RBD, side chain of residues that form the hydrogen bonds and salt bridges are displayed.

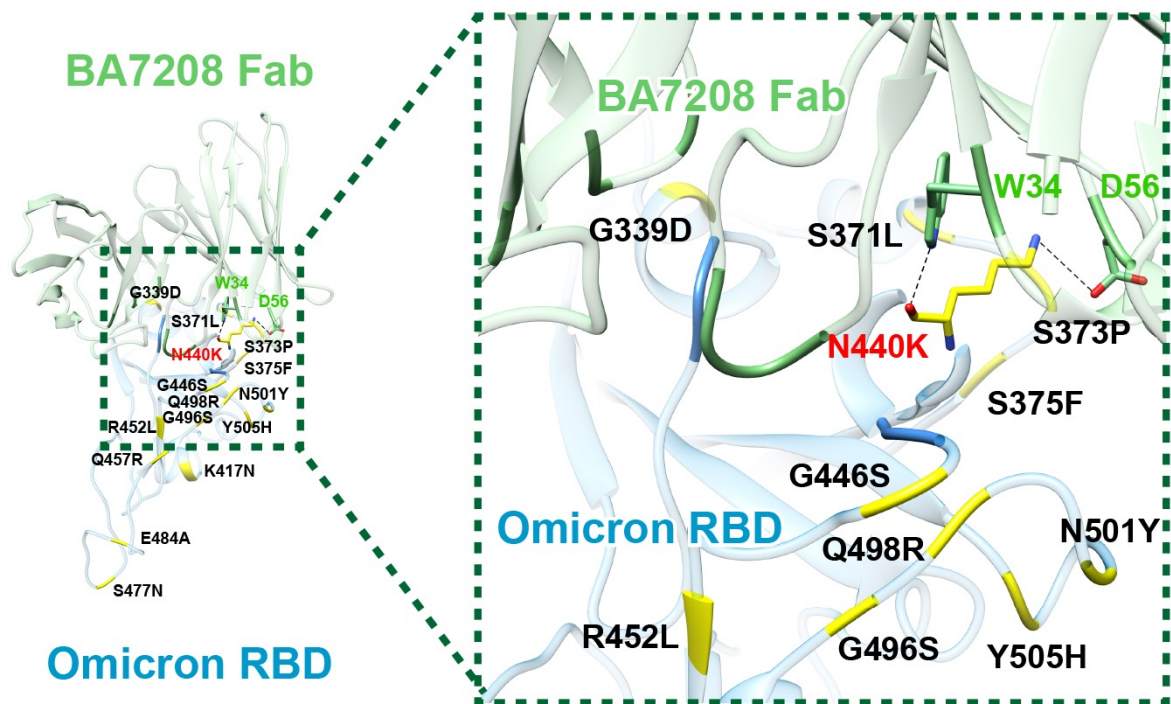

**Fig. S9** Mutational residues in Omicron RBD are labeled, only N440K (red) interacts directly with residues W34 and D56 (green) in BA7208 Fab heavy chain.

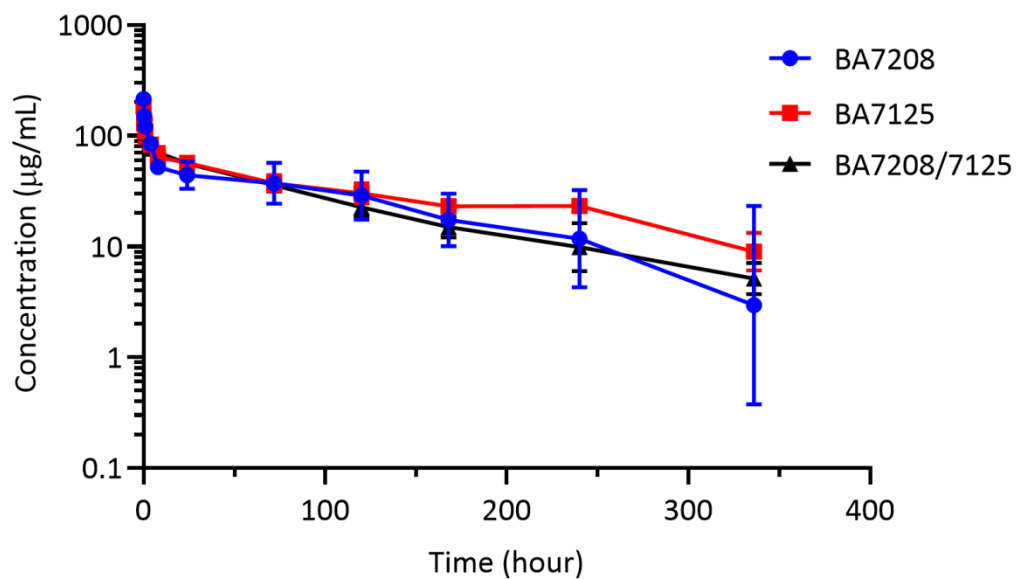

**Fig. S10 Log-linear serum concentration versus time profiles of BA7208, BA7125 and BA7208/7125 in mice.** Mice (BALB/c) were administered intravenously at a dose of 10 mg/kg with BA7208, BA7125 and BA7208/7125. Antibody concentrations in serum were determined in Elisa with RBD protein of Delta variant as the capture reagent. Results are shown as Mean  $\pm$  SD (N = 3). The main PK kinetic parameters were calculated using Phoenix WinNonlin.

**Table S1. Binding free energy calculation.** The systems with relatively higher binding free energies than the Delta system are highlighted in blue, and those with lower ones are highlighted in orange. The BA7208 shows good binding ability for all kinds of Spike RBD. While the BA7054 and BA7125 show weaker bindings for Omicron Spike RBD, especially in the BA7125-RBD systems. These results are consistent with the experimental data we observed. Of note is the BA7054-7125-RBD systems, where the binding ability for Omicron is not as good as other variants.

**BA7054-RBD**

| ddG     | Type0      | Type1      |
|---------|------------|------------|
| Delta   | 0          | 0          |
| Alpha   | 0.00±0.01  | -0.06±0.05 |
| Beta    | -0.04±0.04 | -0.03±0.03 |
| Gamma   | -0.02±0.04 | -0.02±0.05 |
| Omicron | 1.90±0.20  | 2.02±0.81  |

**BA7125-RBD:**

| ddG     | Type0     | Type1     |
|---------|-----------|-----------|
| Delta   | 0         | 0         |
| Alpha   | 0.25±0.09 | 0.17±0.08 |
| Beta    | 0.57±0.19 | 0.60±0.25 |
| Gamma   | 0.92±0.22 | 0.83±0.37 |
| Omicron | 6.50±1.62 | 6.80±1.85 |

**BA7208-RBD:**

| ddG     | Type0     | Type1     |
|---------|-----------|-----------|
| Delta   | 0         | 0         |
| Alpha   | 0.04±0.01 | 0.04±0.02 |
| Beta    | 0.31±0.06 | 0.32±0.23 |
| Gamma   | 0.32±0.03 | 0.31±0.04 |
| Omicron | 0.24±0.14 | 0.30±0.31 |

**BA7054-7125-RBD:**

| ddG     | Type0      | Type1      |
|---------|------------|------------|
| Delta   | 0          | 0          |
| Alpha   | 0.02±0.10  | 0.00±0.13  |
| Beta    | -0.12±0.31 | -0.07±0.35 |
| Gamma   | -0.44±0.29 | -0.35±0.40 |
| Omicron | 3.86±4.95  | 0.90±5.19  |

**BA7208-7125-RBD:**

| ddG     | Type0      | Type1      |
|---------|------------|------------|
| Delta   | 0          | 0          |
| Alpha   | 0.68±1.88  | 0.84±1.33  |
| Beta    | -1.73±0.68 | -1.72±0.94 |
| Gamma   | -1.53±0.77 | -1.43±1.02 |
| Omicron | -8.06±3.14 | -6.67±3.94 |

**Table S2. Cryo-EM data collection, refinement and validation statistics for the structure of Delta S with BA7125-Fab and BA7208-Fab.**

| Delta S-BA7208/BA7125 Consensus map         |                 |
|---------------------------------------------|-----------------|
| <b>Data collection and image processing</b> |                 |
| Microscope                                  | FEI Titan Krios |
| Camera                                      | Gatan K3        |
| Magnification                               | 74,880          |
| Voltage(kV)                                 | 300             |
| Total dose (e-/Å <sup>2</sup> )             | 50              |
| Defocus range (µm)                          | -1.5 to -2.5    |
| Pixel size (Å/pixel)                        | 0.66            |
| Frames/movie                                | 36              |
| Movies (total)                              | 12,414          |
| Initial particles images                    | 1,148,586       |
| Final particles images                      | 309,383         |
| Symmetry imposed                            | C1              |
| <b>Map resolution (Å)</b>                   | 3.08            |
| FSC threshold                               | 0.143           |
| Map resolution range (Å)                    | 2.0-6.5         |
| <b>Refinement</b>                           |                 |
| Initial model used (PDB code)               | 6XCN            |
| <b>Model composition</b>                    |                 |
| Non-hydrogen atoms                          | 39,008          |
| Protein residues                            | 4,985           |
| Ligand                                      | 30              |
| <b>R.m.s. deviations</b>                    |                 |
| Bond lengths (Å)                            | 0.005           |
| Bond angles (°)                             | 0.701           |
| <b>Validation</b>                           |                 |
| MolProbity score                            | 2.15            |
| Clashscore                                  | 10.85           |
| Poor rotamers (%)                           | 0.35            |
| <b>Ramachandran plot</b>                    |                 |
| Favored (%)                                 | 92.83           |
| Allowed (%)                                 | 7.17            |
| Disallowed (%)                              | 0.00            |



**Table S3. Protein-protein interaction between Delta RBD and BA7208 Fab.**

|                                | Residue in<br>Delta RBD | Residue in<br>BA7208 Fab | Distance (Å) |
|--------------------------------|-------------------------|--------------------------|--------------|
| <b>Hydrogen bond</b>           | Thr(T)-345              | Phe(F)-94                | 3.3          |
|                                | Arg(R)-346              | Tyr(Y)-91                | 2.6          |
|                                | Arg(R)-346              | Gly(G)-104               | 2.6          |
|                                | Lys(K)-444              | Asp(D)-105               | 2.6          |
| <b>Salt bridge</b>             | Lys(K)-444              | Asp(D)-105               | 2.6          |
| <b>Cation-<math>\pi</math></b> | Arg(R)-346              | Trp(W)-32                | 3.8          |

Residues in light green cells are in light chain of BA7208 Fab, Residues in dark green cells are in heavy chain of BA7208 Fab.

**Table S4. Protein-protein interaction between Delta RBD and BA7125 Fab.**

|                             | <b>Residue in<br/>Delta RBD</b> | <b>Residue in<br/>BA7125 Fab</b> | <b>Distance (Å)</b> |
|-----------------------------|---------------------------------|----------------------------------|---------------------|
| <b><i>Hydrogen bond</i></b> | Arg(R)-403                      | Asp(D)-94                        | 3.3                 |
|                             | Lys(K)-417                      | Asp(D)-94                        | 3.3                 |
|                             | Tyr(Y)-453                      | Gly(G)-93                        | 3.4                 |
|                             | Lys(K)-458                      | Gly(G)-31                        | 2.8                 |
|                             | Gly(G)-476                      | Tyr(Y)-32                        | 2.6                 |
|                             | Tyr(Y)-489                      | His(H)-101                       | 2.6                 |
|                             | Phe(F)-490                      | Tyr(Y)-33                        | 3.3                 |
|                             | Tyr(Y)-505                      | Glu(E)-1                         | 2.4                 |
| <b><i>Salt bridge</i></b>   | Arg(R)-403                      | Asp(D)-94                        | 3.3                 |
|                             | Lys(K)-417                      | Asp(D)-94                        | 3.3                 |

Residues in light yellow cells are in light chain of BA7125 Fab, Residues in dark yellow cells are in heavy chain of BA7125 Fab.

**Table S5. Cryo-EM data collection, refinement and validation statistics for the structure of Delta S with BA7054-Fab and BA7125-Fab.**

| Delta S-BA7054/BA7125 Consensus map                 |                 |
|-----------------------------------------------------|-----------------|
| <b>Data collection and processing</b>               |                 |
| Microscope                                          | FEI Titan Krios |
| Camera                                              | Gatan K3        |
| Magnification                                       | 46656           |
| Voltage (kV)                                        | 300             |
| Electron exposure (e <sup>-</sup> /Å <sup>2</sup> ) | 50              |
| Defocus range (μm)                                  | -1.0 to -2.0    |
| Pixel size (Å)                                      | 1.072           |
| Initial particles images                            | 1,659,975       |
| Final particles images                              | 335,175         |
| Symmetry imposed                                    | C1              |
| <b>Map resolution (Å)</b>                           | 3.21            |
| FSC threshold                                       | 0.143           |
| Map resolution range (Å)                            | 2.0-6.5         |
| <b>Refinement</b>                                   |                 |
| Initial model used (PDB code)                       | 6XCN            |
| Map sharpening <i>B</i> factor (Å <sup>2</sup> )    | -120            |
| <b>Model composition</b>                            |                 |
| Non-hydrogen atoms                                  | 39033           |
| Protein residues                                    | 4998            |
| Ligands                                             | 36              |
| <b>R.m.s. deviations</b>                            |                 |
| Bond lengths (Å)                                    | 0.004           |
| Bond angles (°)                                     | 0.826           |
| <b>Validation</b>                                   |                 |
| MolProbity score                                    | 3.03            |
| Clashscore                                          | 9.88            |
| Poor rotamers (%)                                   | 0.28            |
| <b>Ramachandran plot</b>                            |                 |
| Favored (%)                                         | 94.42           |
| Allowed (%)                                         | 5.58            |
| Disallowed (%)                                      | 0.00            |

**Table S6. Protein-protein interaction between Delta RBD and BA7054 Fab.**

|                             | <b>Residue in<br/>Delta RBD</b> | <b>Residue in<br/>BA7054 Fab</b> | <b>Distance (Å)</b> |
|-----------------------------|---------------------------------|----------------------------------|---------------------|
| <b><i>Hydrogen bond</i></b> | Arg(R)-346                      | Ala(A)-91                        | 2.3                 |
|                             | Arg(R)-346                      | Thr(T)-103                       | 3.1                 |
|                             | Asn(N)-440                      | Asp(D)-54                        | 2.1                 |
|                             | Asn(N)-440                      | Asn(N)-57                        | 3.1                 |
|                             | Lys(K)-444                      | Asp(D)-105                       | 2.7                 |
|                             | Lys(K)-444                      | Asp(D)-106                       | 3.1                 |
| <b><i>Salt bridge</i></b>   | Lys(K)-444                      | Asp(D)-105                       | 2.7                 |
|                             | Lys(K)-444                      | Asp(D)-106                       | 3.6                 |

Residues in light pink cells are in light chain of BA7054 Fab, Residues in dark pink cells are in heavy chain of BA7054 Fab.

**Table S7. Cryo-EM data collection, refinement and validation statistics for the structure of Omicron S with BA7208-Fab.**

| Omicron S-BA7208 Consensus map                      |                 |
|-----------------------------------------------------|-----------------|
| <b>Data collection and processing</b>               |                 |
| Microscope                                          | FEI Titan Krios |
| Camera                                              | Gatan K3        |
| Magnification                                       | 81,000          |
| Voltage (kV)                                        | 300             |
| Electron exposure (e <sup>-</sup> /Å <sup>2</sup> ) | 50              |
| Defocus range (μm)                                  | -1.0~-2.0       |
| Pixel size (Å)                                      | 0.856           |
| Frames/movie                                        | 32              |
| Movies (total)                                      | 2,554           |
| Initial particle images (no.)                       | 633,788         |
| Final particle images (no.)                         | 439,731         |
| Symmetry imposed                                    | C1              |
| <b>Map resolution (Å)</b>                           | 2.62            |
| FSC threshold                                       | 0.143           |
| Map resolution range (Å)                            | 1.8-4.5         |
| <b>Refinement</b>                                   |                 |
| Initial model used (PDB code)                       | AF2 predicted   |
| Model resolution (Å)                                | 2.62            |
| FSC threshold                                       | 0.143           |
| Model resolution range (Å)                          | 1.8-4.5         |
| Map sharpening <i>B</i> factor (Å <sup>2</sup> )    | -97.2           |
| <b>Model composition</b>                            |                 |
| Protein residues                                    | 3,296           |
| <b>R.m.s. deviations</b>                            |                 |
| Bond lengths (Å)                                    | 0.003           |
| Bond angles (°)                                     | 0.556           |
| <b>Validation</b>                                   |                 |
| Clashscore                                          | 9.23            |
| Poor rotamers (%)                                   | 0               |
| <b>Ramachandran plot</b>                            |                 |
| Favored (%)                                         | 98.18           |
| Allowed (%)                                         | 1.82            |

Disallowed (%)

0

---

**Table S8. Protein-protein interaction between Omicron BA.1 RBD and BA7208 Fab.**

|                                | Residue in<br>Omicron RBD | Residue in<br>BA7208 Fab | Distance (Å) |
|--------------------------------|---------------------------|--------------------------|--------------|
| <b>Hydrogen bond</b>           | Thr(T)-345                | Phe(F)-94                | 3.2          |
|                                | Arg(R)-346                | Tyr(Y)-91                | 3.4          |
|                                | Arg(R)-346                | Asp(D)-92                | 2.8          |
|                                | Arg(R)-346                | Gly(G)-104               | 2.8          |
|                                | Lys(K)-440                | Trp(W)-34                | 2.9          |
|                                | Lys(K)-440                | Asp(D)-56                | 3.5          |
|                                | Ser(S)-443                | Gly(G)-103               | 3.7          |
|                                | Lys(K)-444                | Asp(D)-105               | 2.6          |
| <b>Salt bridge</b>             | Arg(R)-346                | Asp(D)-92                | 3.6          |
|                                | Lys(K)-440                | Asp(D)-56                | 3.5          |
|                                | Lys(K)-444                | Asp(D)-105               | 2.6          |
| <b>Cation-<math>\pi</math></b> | Arg(R)-346                | Trp(W)-32                | 3.6          |

Residues in light green cells are in light chain of BA7208 Fab, Residues in dark green cells are in heavy chain of BA7208 Fab.

**Table S9. PK parameters of single intravenous administration of BA7208, BA7125 and BA7208/7125 in mice (n=3).**

| PK Parameters                       | BA7208   |          | BA7125    |          | BA7208/7125 |          |
|-------------------------------------|----------|----------|-----------|----------|-------------|----------|
|                                     | Mean     | SD       | Mean      | SD       | Mean        | SD       |
| $T_{1/2}$ (hour)                    | 94.215   | 43.674   | 127.749   | 15.723   | 100.494     | 10.433   |
| $T_{max}$ (hour)                    | 0.083    | 0.000    | 0.083     | 0.000    | 0.083       | 0.000    |
| $C_{max}$ ( $\mu$ g/mL)             | 215.748  | 25.166   | 184.160   | 22.316   | 194.473     | 12.921   |
| $C_0$ ( $\mu$ g/mL)                 | 231.827  | 27.323   | 197.348   | 23.664   | 209.692     | 16.702   |
| $AUC_{0-t}$ (hour* $\mu$ g/mL)      | 8577.179 | 3127.581 | 9990.807  | 1195.331 | 7293.982    | 1635.068 |
| $AUC_{0-\infty}$ (hour* $\mu$ g/mL) | 9695.235 | 4029.493 | 11778.903 | 1960.283 | 8468.373    | 1247.218 |
| $V_z$ (mL/kg)                       | 137.960  | 22.400   | 157.326   | 7.891    | 172.773     | 23.143   |
| Cl(mL/hour/kg)                      | 1.205    | 0.633    | 0.867     | 0.159    | 1.197       | 0.164    |
| $MRT_{0-t}$ (hour)                  | 142.535  | 59.431   | 180.680   | 17.756   | 127.411     | 12.514   |
